# Supplementary material for: Neutral theory: applicability and neutrality of using generic health-related quality of life tools in diseases or conditions where specific tools are available
Source: Springer Nature journal article supplement (doi:10.1186/s12874-021-01279-w), 2021-04-26
Supplement: MOESM2 [file 19106540]

**Neutral Theory: applicability and Neutrality of using generic health-related quality of life tools in diseases or conditions where specific tools are available**

**Ravi Jandhyala**

Medialis Limited, Banbury, UK

Email: [ravi@medialis.co.uk](mailto:ravi@medialis.co.uk)

Telephone: +44 7717 448656

Table 1.1: The table presents the potential misclassification (median proportions of false positives and negatives along with 5th and 95th percentiles) for each QOL tool as compared to SF-36. The design (total number of items, overlap) and accuracy (sensitivity, specificity) are also provided. The table presents QOL tools for rare diseases. Prevalence of poor QOL is 20%.

| Tool name                                                     | Design   | Accuracy     | False negatives   | False positives   |
|---------------------------------------------------------------|----------|--------------|-------------------|-------------------|
| Lupus                                                         | (43, 6)  | (0.14, 0.12) | 0.64 (0.33, 0.91) | 0.96 (0.88, 1.00) |
| Kids <i>T IPT ools</i>                                        | (28, 3)  | (0.11, 0.09) | 0.73 (0.40, 1.00) | 1.00 (0.90, 1.00) |
| IQol32                                                        | (31, 4)  | (0.13, 0.09) | 0.71 (0.40, 1.00) | 0.96 (0.89, 1.00) |
| FBI                                                           | (25, 1)  | (0.04, 0.06) | 0.83 (0.50, 1.00) | 1.00 (0.95, 1.00) |
| ASQoL                                                         | (18, 1)  | (0.06, 0.06) | 0.83 (0.50, 1.00) | 1.00 (0.94, 1.00) |
| PKU-QoL                                                       | (65, 7)  | (0.11, 0.18) | 0.56 (0.27, 0.83) | 1.00 (0.89, 1.00) |
| CFQ-R                                                         | (50, 20) | (0.40, 0.25) | 0.36 (0.11, 0.67) | 0.89 (0.75, 1.00) |
| EORTC QLQ-OV28                                                | (19, 0)  | (0.00, 0.05) | 0.83 (0.55, 1.00) | 1.00 (1.00, 1.00) |
| EORTC QLQ-PAN26                                               | (26, 2)  | (0.08, 0.08) | 0.75 (0.43, 1.00) | 1.00 (0.91, 1.00) |
| PANQOL                                                        | (26, 3)  | (0.12, 0.09) | 0.73 (0.40, 1.00) | 0.96 (0.90, 1.00) |
| ITP-PAQ                                                       | (44, 6)  | (0.14, 0.12) | 0.67 (0.33, 0.91) | 0.96 (0.88, 1.00) |
| AGDHA                                                         | (25, 4)  | (0.16, 0.06) | 0.80 (0.50, 1.00) | 0.96 (0.88, 1.00) |
| The Health assessment questionnaire disability index (HAQ-DI) | (126, 6) | (0.05, 0.31) | 0.43 (0.20, 0.67) | 1.00 (0.92, 1.00) |
| Toronto Extremity Salvage Score (TESS)                        | (32, 5)  | (0.16, 0.09) | 0.71 (0.38, 1.00) | 0.96 (0.88, 1.00) |
| UCLA-GIT                                                      | (34, 2)  | (0.06, 0.08) | 0.75 (0.43, 1.00) | 1.00 (0.93, 1.00) |
| Myasthenia Gravis Questionnaire (MGQ)                         | (15, 2)  | (0.13, 0.06) | 0.80 (0.50, 1.00) | 0.96 (0.89, 1.00) |
| ALSAQ-40                                                      | (40, 3)  | (0.07, 0.11) | 0.67 (0.38, 1.00) | 1.00 (0.91, 1.00) |

Table 1.2: The table presents the potential misclassification (median proportions of false positives and negatives along with 5th and 95th percentiles) for each QOL tool as compared to SF-36. The design (total number of items, overlap) and accuracy (sensitivity, specificity) are also provided. The table presents QOL tools for rare diseases. Prevalence of poor QOL is 50%.

| Tool name                                                     | Design   | Accuracy     | False negatives   | False positives   |
|---------------------------------------------------------------|----------|--------------|-------------------|-------------------|
| Lupus                                                         | (43, 6)  | (0.14, 0.12) | 0.88 (0.71, 1.00) | 0.88 (0.71, 1.00) |
| Kids <i>T IPT ools</i>                                        | (28, 3)  | (0.11, 0.09) | 0.93 (0.77, 1.00) | 0.91 (0.75, 1.00) |
| IQol32                                                        | (31, 4)  | (0.13, 0.09) | 0.92 (0.76, 1.00) | 0.88 (0.72, 1.00) |
| FBI                                                           | (25, 1)  | (0.04, 0.06) | 0.94 (0.83, 1.00) | 1.00 (0.86, 1.00) |
| ASQoL                                                         | (18, 1)  | (0.06, 0.06) | 0.94 (0.82, 1.00) | 0.94 (0.83, 1.00) |
| PKU-QoL                                                       | (65, 7)  | (0.11, 0.18) | 0.84 (0.67, 1.00) | 0.90 (0.73, 1.00) |
| CFQ-R                                                         | (50, 20) | (0.40, 0.25) | 0.71 (0.50, 0.92) | 0.67 (0.46, 0.84) |
| EORTC QLQ-OV28                                                | (19, 0)  | (0.00, 0.05) | 0.94 (0.84, 1.00) | 1.00 (1.00, 1.00) |
| EORTC QLQ-PAN26                                               | (26, 2)  | (0.08, 0.08) | 0.93 (0.79, 1.00) | 0.93 (0.79, 1.00) |
| PANQOL                                                        | (26, 3)  | (0.12, 0.09) | 0.92 (0.77, 1.00) | 0.89 (0.74, 1.00) |
| ITP-PAQ                                                       | (44, 6)  | (0.14, 0.12) | 0.88 (0.71, 1.00) | 0.88 (0.71, 1.00) |
| AGDHA                                                         | (25, 4)  | (0.16, 0.06) | 0.93 (0.80, 1.00) | 0.87 (0.70, 1.00) |
| The Health assessment questionnaire disability index (HAQ-DI) | (126, 6) | (0.05, 0.31) | 0.76 (0.58, 0.91) | 0.94 (0.79, 1.00) |
| Toronto Extremity Salvage Score (TESS)                        | (32, 5)  | (0.16, 0.09) | 0.92 (0.75, 1.00) | 0.87 (0.69, 1.00) |
| UCLA-GIT                                                      | (34, 2)  | (0.06, 0.08) | 0.93 (0.79, 1.00) | 0.94 (0.82, 1.00) |
| Myasthenia Gravis Questionnaire (MGQ)                         | (15, 2)  | (0.13, 0.06) | 0.94 (0.81, 1.00) | 0.88 (0.73, 1.00) |
| ALSAQ-40                                                      | (40, 3)  | (0.07, 0.11) | 0.90 (0.75, 1.00) | 0.93 (0.79, 1.00) |

Table 1.3: The table presents the potential misclassification (median proportions of false positives and negatives along with 5th and 95th percentiles) for each QOL tool as compared to SF-36. The design (total number of items, overlap) and accuracy (sensitivity, specificity) are also provided. The table presents QOL tools for rare diseases. Prevalence of poor QOL is 80%.

| Tool name                                                     | Design   | Accuracy     | False negatives   | False positives   |
|---------------------------------------------------------------|----------|--------------|-------------------|-------------------|
| Lupus                                                         | (43, 6)  | (0.14, 0.12) | 0.96 (0.89, 1.00) | 0.62 (0.30, 0.88) |
| Kids <i>TIP Tools</i>                                         | (28, 3)  | (0.11, 0.09) | 1.00 (0.91, 1.00) | 0.67 (0.38, 1.00) |
| IQoL32                                                        | (31, 4)  | (0.13, 0.09) | 1.00 (0.91, 1.00) | 0.64 (0.33, 0.90) |
| FBI                                                           | (25, 1)  | (0.04, 0.06) | 1.00 (0.95, 1.00) | 0.86 (0.57, 1.00) |
| ASQoL                                                         | (18, 1)  | (0.06, 0.06) | 1.00 (0.95, 1.00) | 0.83 (0.50, 1.00) |
| PKU-QoL                                                       | (65, 7)  | (0.11, 0.18) | 0.96 (0.87, 1.00) | 0.67 (0.33, 1.00) |
| CFQ-R                                                         | (50, 20) | (0.40, 0.25) | 0.92 (0.77, 1.00) | 0.31 (0.11, 0.54) |
| EORTC QLQ-OV28                                                | (19, 0)  | (0.00, 0.05) | 1.00 (0.95, 1.00) | 1.00 (1.00, 1.00) |
| EORTC QLQ-PAN26                                               | (26, 2)  | (0.08, 0.08) | 1.00 (0.91, 1.00) | 0.75 (0.43, 1.00) |
| PANQOL                                                        | (26, 3)  | (0.12, 0.09) | 1.00 (0.91, 1.00) | 0.67 (0.33, 1.00) |
| ITP-PAQ                                                       | (44, 6)  | (0.14, 0.12) | 0.96 (0.89, 1.00) | 0.62 (0.33, 0.89) |
| AGDHA                                                         | (25, 4)  | (0.16, 0.06) | 1.00 (0.93, 1.00) | 0.60 (0.30, 0.86) |
| The Health assessment questionnaire disability index (HAQ-DI) | (126, 6) | (0.05, 0.31) | 0.93 (0.83, 1.00) | 0.80 (0.43, 1.00) |
| Toronto Extremity Salvage Score (TESS)                        | (32, 5)  | (0.16, 0.09) | 1.00 (0.90, 1.00) | 0.60 (0.29, 0.86) |
| UCLA-GIT                                                      | (34, 2)  | (0.06, 0.08) | 1.00 (0.92, 1.00) | 0.80 (0.50, 1.00) |
| Myasthenia Gravis Questionnaire (MGQ)                         | (15, 2)  | (0.13, 0.06) | 1.00 (0.94, 1.00) | 0.64 (0.33, 0.90) |
| ALSAQ-40                                                      | (40, 3)  | (0.07, 0.11) | 1.00 (0.90, 1.00) | 0.75 (0.43, 1.00) |

Table 1.5: The table presents the potential misclassification (median proportions of false positives and negatives along with 5th and 95th percentiles) for each QOL tool as compared to SF-36. The design (total number of items, overlap), accuracy (sensitivity, specificity) are also provided. The table presents disease-specific QOL tools with 10 highest and 10 lowest accuracy (sensitivity + specificity). Prevalence of poor QOL is 20%.

| Tool name                                              | Design   | Accuracy     | False negatives   | False positives   |
|--------------------------------------------------------|----------|--------------|-------------------|-------------------|
| KDQOL-SF                                               | (82, 35) | (0.43, 1.00) | 0.36 (0.20, 0.53) | 0.00 (0.00, 0.00) |
| QUALIOST                                               | (30, 30) | (1.00, 0.38) | 0.00 (0.00, 0.00) | 0.38 (0.23, 0.56) |
| CRQ-SAS 17                                             | (17, 9)  | (0.53, 0.07) | 0.88 (0.62, 1.00) | 0.64 (0.46, 0.81) |
| Angina Pectoris Quality of Life Questionnaire (APQLQ)  | (22, 11) | (0.50, 0.08) | 0.88 (0.64, 1.00) | 0.65 (0.48, 0.82) |
| K-BILD                                                 | (10, 5)  | (0.50, 0.03) | 1.00 (0.75, 1.00) | 0.67 (0.48, 0.83) |
| Clinical COPD                                          | (14, 6)  | (0.43, 0.03) | 1.00 (0.80, 1.00) | 0.70 (0.52, 0.86) |
| EORTC QLQ-LC13                                         | (14, 6)  | (0.43, 0.03) | 1.00 (0.80, 1.00) | 0.70 (0.52, 0.86) |
| Inflammatory Bowel Disease Questionnaire (IBDQ)        | (32, 11) | (0.34, 0.11) | 0.87 (0.67, 1.00) | 0.73 (0.54, 0.89) |
| Chronic Respiratory Questionnaire (CRQ)                | (46, 12) | (0.26, 0.18) | 0.81 (0.62, 1.00) | 0.76 (0.57, 0.93) |
| Quality of Life in Epilepsy Inventory (QOLIE-31P)      | (38, 11) | (0.29, 0.14) | 0.85 (0.64, 1.00) | 0.75 (0.56, 0.92) |
| Epilepsy-related Fears in Parents Questionnaire (EFPQ) | (17, 0)  | (0.00, 0.05) | 0.94 (0.84, 1.00) | 1.00 (1.00, 1.00) |
| Stigma (Epilepsy)                                      | (24, 0)  | (0.00, 0.05) | 0.94 (0.84, 1.00) | 1.00 (1.00, 1.00) |
| MADRS-S                                                | (10, 0)  | (0.00, 0.03) | 1.00 (0.89, 1.00) | 1.00 (1.00, 1.00) |
| ICSmaleSF                                              | (14, 0)  | (0.00, 0.03) | 1.00 (0.89, 1.00) | 1.00 (1.00, 1.00) |
| International Prostate Symptom Score (I-PSS)           | (8, 0)   | (0.00, 0.03) | 1.00 (0.89, 1.00) | 1.00 (1.00, 1.00) |
| The Glaucoma Symptom Scale Questionnaire (GSSQ)        | (10, 0)  | (0.00, 0.03) | 1.00 (0.89, 1.00) | 1.00 (1.00, 1.00) |
| Chronic Sinusitis Survey (CSS)                         | (6, 0)   | (0.00, 0.03) | 1.00 (0.89, 1.00) | 1.00 (1.00, 1.00) |
| WHO-DTSQ                                               | (8, 0)   | (0.00, 0.03) | 1.00 (0.89, 1.00) | 1.00 (1.00, 1.00) |
| BPH Index (Bothersome Index)                           | (8, 0)   | (0.00, 0.03) | 1.00 (0.89, 1.00) | 1.00 (1.00, 1.00) |
| ICIQ-UI                                                | (3, 0)   | (0.00, 0.00) | 1.00 (1.00, 1.00) | 1.00 (1.00, 1.00) |

Table 1.6: The table presents the potential misclassification (median proportions of false positives and negatives along with 5th and 95th percentiles) for each QOL tool as compared to SF-36. The design (total number of items, overlap), accuracy (sensitivity, specificity) are also provided. The table presents disease-specific QOL tools with 10 highest and 10 lowest accuracy (sensitivity + specificity). Prevalence of poor QOL is 20%.

| Tool name                                              | Design   | Accuracy     | False negatives   | False positives   |
|--------------------------------------------------------|----------|--------------|-------------------|-------------------|
| KDQOL-SF                                               | (82, 35) | (0.43, 1.00) | 0.70 (0.52, 0.86) | 0.00 (0.00, 0.00) |
| QUALIOST                                               | (30, 30) | (1.00, 0.38) | 0.00 (0.00, 0.00) | 0.14 (0.04, 0.25) |
| CRQ-SAS 17                                             | (17, 9)  | (0.53, 0.07) | 1.00 (0.86, 1.00) | 0.30 (0.12, 0.50) |
| Angina Pectoris Quality of Life Questionnaire (APQLQ)  | (22, 11) | (0.50, 0.08) | 1.00 (0.86, 1.00) | 0.31 (0.13, 0.50) |
| K-BILD                                                 | (10, 5)  | (0.50, 0.03) | 1.00 (0.91, 1.00) | 0.32 (0.14, 0.52) |
| Clinical COPD                                          | (14, 6)  | (0.43, 0.03) | 1.00 (0.92, 1.00) | 0.36 (0.16, 0.56) |
| EORTC QLQ-LC13                                         | (14, 6)  | (0.43, 0.03) | 1.00 (0.92, 1.00) | 0.36 (0.16, 0.56) |
| Inflammatory Bowel Disease Questionnaire (IBDQ)        | (32, 11) | (0.34, 0.11) | 1.00 (0.87, 1.00) | 0.38 (0.17, 0.62) |
| Chronic Respiratory Questionnaire (CRQ)                | (46, 12) | (0.26, 0.18) | 0.95 (0.84, 1.00) | 0.44 (0.18, 0.70) |
| Quality of Life in Epilepsy Inventory (QOLIE-31P)      | (38, 11) | (0.29, 0.14) | 0.95 (0.86, 1.00) | 0.42 (0.18, 0.67) |
| Epilepsy-related Fears in Parents Questionnaire (EFPQ) | (17, 0)  | (0.00, 0.05) | 1.00 (0.95, 1.00) | 1.00 (1.00, 1.00) |
| Stigma (Epilepsy)                                      | (24, 0)  | (0.00, 0.05) | 1.00 (0.95, 1.00) | 1.00 (1.00, 1.00) |
| MADRS-S                                                | (10, 0)  | (0.00, 0.03) | 1.00 (0.96, 1.00) | 1.00 (1.00, 1.00) |
| ICSmaleSF                                              | (14, 0)  | (0.00, 0.03) | 1.00 (0.96, 1.00) | 1.00 (1.00, 1.00) |
| International Prostate Symptom Score (I-PSS)           | (8, 0)   | (0.00, 0.03) | 1.00 (0.96, 1.00) | 1.00 (1.00, 1.00) |
| The Glaucoma Symptom Scale Questionnaire (GSSQ)        | (10, 0)  | (0.00, 0.03) | 1.00 (0.96, 1.00) | 1.00 (1.00, 1.00) |
| Chronic Sinusitis Survey (CSS)                         | (6, 0)   | (0.00, 0.03) | 1.00 (0.96, 1.00) | 1.00 (1.00, 1.00) |
| WHO-DTSQ                                               | (8, 0)   | (0.00, 0.03) | 1.00 (0.96, 1.00) | 1.00 (1.00, 1.00) |
| BPH Index (Bothersome Index)                           | (8, 0)   | (0.00, 0.03) | 1.00 (0.96, 1.00) | 1.00 (1.00, 1.00) |
| ICIQ-UI                                                | (3, 0)   | (0.00, 0.00) | 1.00 (1.00, 1.00) | 1.00 (1.00, 1.00) |

Table 1.7: The table presents the potential misclassification (median proportions of false positives and negatives along with 5th and 95th percentiles) for each QOL tool as compared to SF-36. The design (total number of items, overlap) and accuracy (sensitivity, specificity) are also provided. The table presents symptom-specific QOL tools with 10 highest and 10 lowest accuracy (sensitivity + specificity). Prevalence of poor QOL is 20%.

| Tool name                                                    | Design   | Accuracy     | False negatives   | False positives   |
|--------------------------------------------------------------|----------|--------------|-------------------|-------------------|
| SAQLI Calgary Sleep Apnea Quality of Life Index              | (19, 10) | (0.53, 0.07) | 0.62 (0.17, 1.00) | 0.88 (0.76, 0.96) |
| FACT-Leu                                                     | (5, 3)   | (0.60, 0.00) | 1.00 (1.00, 1.00) | 0.87 (0.76, 0.96) |
| Fact <sub>G</sub>                                            | (15, 6)  | (0.40, 0.06) | 0.71 (0.33, 1.00) | 0.91 (0.80, 1.00) |
| SCQOLIT                                                      | (29, 10) | (0.34, 0.11) | 0.60 (0.25, 1.00) | 0.92 (0.81, 1.00) |
| Asthma Quality of Life Questionnaire (AQLQ)                  | (51, 13) | (0.25, 0.19) | 0.50 (0.20, 0.80) | 0.94 (0.82, 1.00) |
| Clinical COPD                                                | (28, 9)  | (0.32, 0.10) | 0.62 (0.25, 1.00) | 0.92 (0.81, 1.00) |
| Angina Pectoris Quality of Life Questionnaire (APQLQ)        | (17, 6)  | (0.35, 0.06) | 0.75 (0.33, 1.00) | 0.92 (0.81, 1.00) |
| Quality of Life in Epilepsy Inventory (QOLIE-31P)            | (13, 5)  | (0.38, 0.03) | 0.86 (0.50, 1.00) | 0.92 (0.81, 1.00) |
| SNOT-22                                                      | (13, 5)  | (0.38, 0.03) | 0.86 (0.50, 1.00) | 0.92 (0.81, 1.00) |
| EORTC QLQ-C 30                                               | (55, 11) | (0.20, 0.20) | 0.50 (0.22, 0.78) | 0.95 (0.84, 1.00) |
| DDS (Diabetes Distress Scale)                                | (18, 0)  | (0.00, 0.05) | 0.83 (0.55, 1.00) | 1.00 (1.00, 1.00) |
| ICIQ-UI                                                      | (14, 0)  | (0.00, 0.03) | 1.00 (0.67, 1.00) | 1.00 (1.00, 1.00) |
| Assessment of SpondyloArthritis International Society (ASAS) | (12, 0)  | (0.00, 0.03) | 1.00 (0.67, 1.00) | 1.00 (1.00, 1.00) |
| Rhinitis QOL Questionnaire (RQLQ)                            | (9, 0)   | (0.00, 0.03) | 1.00 (0.67, 1.00) | 1.00 (1.00, 1.00) |
| Fibromyalgia impact questionnaire (FIQ)                      | (6, 0)   | (0.00, 0.03) | 1.00 (0.67, 1.00) | 1.00 (1.00, 1.00) |
| Rhinitis Disability Index (RSDI)                             | (10, 0)  | (0.00, 0.03) | 1.00 (0.67, 1.00) | 1.00 (1.00, 1.00) |
| 1 (MSQ)                                                      | (11, 0)  | (0.00, 0.03) | 1.00 (0.67, 1.00) | 1.00 (1.00, 1.00) |
| PDQ-8                                                        | (3, 0)   | (0.00, 0.00) | 1.00 (1.00, 1.00) | 1.00 (1.00, 1.00) |
| Beck Depression Inventory-II (BDI-II)                        | (4, 0)   | (0.00, 0.00) | 1.00 (1.00, 1.00) | 1.00 (1.00, 1.00) |
| WHO-DTSQ                                                     | (5, 0)   | (0.00, 0.00) | 1.00 (1.00, 1.00) | 1.00 (1.00, 1.00) |

Table 1.8: The table presents the potential misclassification (median proportions of false positives and negatives along with 5th and 95th percentiles) for each QOL tool as compared to SF-36. The design (total number of items, overlap) and accuracy (sensitivity, specificity) are also provided. The table presents symptom-specific QOL tools with 10 highest and 10 lowest accuracy (sensitivity + specificity). Prevalence of poor QOL is 20%.

| Tool name                                                    | Design   | Accuracy     | False negatives   | False positives   |
|--------------------------------------------------------------|----------|--------------|-------------------|-------------------|
| SAQLI Calgary Sleep Apnea Quality of Life Index              | (19, 10) | (0.53, 0.07) | 0.88 (0.62, 1.00) | 0.64 (0.46, 0.81) |
| FACT-Leu                                                     | (5, 3)   | (0.60, 0.00) | 1.00 (1.00, 1.00) | 0.62 (0.46, 0.79) |
| Fact <sub>G</sub>                                            | (15, 6)  | (0.40, 0.06) | 0.91 (0.71, 1.00) | 0.71 (0.53, 0.86) |
| SCQOLIT                                                      | (29, 10) | (0.34, 0.11) | 0.88 (0.67, 1.00) | 0.73 (0.54, 0.89) |
| Asthma Quality of Life Questionnaire (AQLQ)                  | (51, 13) | (0.25, 0.19) | 0.80 (0.60, 1.00) | 0.77 (0.57, 0.93) |
| Clinical COPD                                                | (28, 9)  | (0.32, 0.10) | 0.88 (0.67, 1.00) | 0.74 (0.56, 0.90) |
| Angina Pectoris Quality of Life Questionnaire (APQLQ)        | (17, 6)  | (0.35, 0.06) | 0.92 (0.75, 1.00) | 0.73 (0.55, 0.89) |
| Quality of Life in Epilepsy Inventory (QOLIE-31P)            | (13, 5)  | (0.38, 0.03) | 1.00 (0.80, 1.00) | 0.72 (0.55, 0.88) |
| SNOT-22                                                      | (13, 5)  | (0.38, 0.03) | 1.00 (0.80, 1.00) | 0.72 (0.55, 0.88) |
| EORTCQLQC 30                                                 | (55, 11) | (0.20, 0.20) | 0.80 (0.62, 0.95) | 0.81 (0.62, 0.95) |
| DDS (Diabetes Distress Scale)                                | (18, 0)  | (0.00, 0.05) | 0.94 (0.84, 1.00) | 1.00 (1.00, 1.00) |
| ICIQ-UI                                                      | (14, 0)  | (0.00, 0.03) | 1.00 (0.89, 1.00) | 1.00 (1.00, 1.00) |
| Assessment of SpondyloArthritis International Society (ASAS) | (12, 0)  | (0.00, 0.03) | 1.00 (0.89, 1.00) | 1.00 (1.00, 1.00) |
| Rhinitis QOL Questionnaire (RQLQ)                            | (9, 0)   | (0.00, 0.03) | 1.00 (0.89, 1.00) | 1.00 (1.00, 1.00) |
| Fibromyalgia impact questionnaire (FIQ)                      | (6, 0)   | (0.00, 0.03) | 1.00 (0.89, 1.00) | 1.00 (1.00, 1.00) |
| Rhinitis Disability Index (RSDI)                             | (10, 0)  | (0.00, 0.03) | 1.00 (0.89, 1.00) | 1.00 (1.00, 1.00) |
| 1 (MSQ)                                                      | (11, 0)  | (0.00, 0.03) | 1.00 (0.89, 1.00) | 1.00 (1.00, 1.00) |
| PDQ-8                                                        | (3, 0)   | (0.00, 0.00) | 1.00 (1.00, 1.00) | 1.00 (1.00, 1.00) |
| Beck Depression Inventory-II (BDI-II)                        | (4, 0)   | (0.00, 0.00) | 1.00 (1.00, 1.00) | 1.00 (1.00, 1.00) |
| WHO-DTSQ                                                     | (5, 0)   | (0.00, 0.00) | 1.00 (1.00, 1.00) | 1.00 (1.00, 1.00) |



Table 1.9: The table presents the potential misclassification (median proportions of false positives and negatives along with 5th and 95th percentiles) for each QOL tool as compared to SF-36. The design (total number of items, overlap) and accuracy (sensitivity, specificity) are also provided. The table presents symptom-specific QOL tools with 10 highest and 10 lowest accuracy (sensitivity + specificity). Prevalence of poor QOL is 20%.

| Tool name                                                    | Design   | Accuracy     | False negatives   | False positives   |
|--------------------------------------------------------------|----------|--------------|-------------------|-------------------|
| SAQLI Calgary Sleep Apnea Quality of Life Index              | (19, 10) | (0.53, 0.07) | 1.00 (0.86, 1.00) | 0.30 (0.12, 0.50) |
| FACT-Leu                                                     | (5, 3)   | (0.60, 0.00) | 1.00 (1.00, 1.00) | 0.29 (0.13, 0.47) |
| Fact <sub>G</sub>                                            | (15, 6)  | (0.40, 0.06) | 1.00 (0.89, 1.00) | 0.36 (0.17, 0.58) |
| SCQOLIT                                                      | (29, 10) | (0.34, 0.11) | 1.00 (0.87, 1.00) | 0.38 (0.17, 0.62) |
| Asthma Quality of Life Questionnaire (AQLQ)                  | (51, 13) | (0.25, 0.19) | 0.95 (0.84, 1.00) | 0.44 (0.18, 0.70) |
| Clinical COPD                                                | (28, 9)  | (0.32, 0.10) | 1.00 (0.88, 1.00) | 0.40 (0.18, 0.64) |
| Angina Pectoris Quality of Life Questionnaire (APQLQ)        | (17, 6)  | (0.35, 0.06) | 1.00 (0.89, 1.00) | 0.40 (0.18, 0.62) |
| Quality of Life in Epilepsy Inventory (QOLIE-31P)            | (13, 5)  | (0.38, 0.03) | 1.00 (0.92, 1.00) | 0.38 (0.17, 0.60) |
| SNOT-22                                                      | (13, 5)  | (0.38, 0.03) | 1.00 (0.92, 1.00) | 0.38 (0.17, 0.60) |
| EORTC <sub>QLQ</sub> 30                                      | (55, 11) | (0.20, 0.20) | 0.95 (0.84, 1.00) | 0.50 (0.22, 0.78) |
| DDS (Diabetes Distress Scale)                                | (18, 0)  | (0.00, 0.05) | 1.00 (0.95, 1.00) | 1.00 (1.00, 1.00) |
| ICIQ-UI                                                      | (14, 0)  | (0.00, 0.03) | 1.00 (0.96, 1.00) | 1.00 (1.00, 1.00) |
| Assessment of SpondyloArthritis International Society (ASAS) | (12, 0)  | (0.00, 0.03) | 1.00 (0.96, 1.00) | 1.00 (1.00, 1.00) |
| Rhinitis QOL Questionnaire (RQLQ)                            | (9, 0)   | (0.00, 0.03) | 1.00 (0.96, 1.00) | 1.00 (1.00, 1.00) |
| Fibromyalgia impact questionnaire (FIQ)                      | (6, 0)   | (0.00, 0.03) | 1.00 (0.96, 1.00) | 1.00 (1.00, 1.00) |
| Rhinitis Disability Index (RSDI)                             | (10, 0)  | (0.00, 0.03) | 1.00 (0.96, 1.00) | 1.00 (1.00, 1.00) |
| 1 (MSQ)                                                      | (11, 0)  | (0.00, 0.03) | 1.00 (0.96, 1.00) | 1.00 (1.00, 1.00) |
| PDQ-8                                                        | (3, 0)   | (0.00, 0.00) | 1.00 (1.00, 1.00) | 1.00 (1.00, 1.00) |
| Beck Depression Inventory-II (BDI-II)                        | (4, 0)   | (0.00, 0.00) | 1.00 (1.00, 1.00) | 1.00 (1.00, 1.00) |
| WHO-DTSQ                                                     | (5, 0)   | (0.00, 0.00) | 1.00 (1.00, 1.00) | 1.00 (1.00, 1.00) |

Table 2.1: The table presents the potential misclassification (median proportions of false positives and negatives along with 5th and 95th percentiles) for each QOL tool as compared to EQ-5D. The design (total number of items, overlap) and accuracy (sensitivity, specificity) are also provided. The table presents QOL tools for rare diseases. Prevalence of poor QOL is 20%.

| Tool name                                                     | Design   | Accuracy     | False negatives   | False positives   | Clusters |
|---------------------------------------------------------------|----------|--------------|-------------------|-------------------|----------|
| Lupus                                                         | (43, 4)  | (0.09, 0.80) | 0.22 (0.08, 0.36) | 1.00 (0.60, 1.00) | 2        |
| Kids <i>TIP Tools</i>                                         | (28, 2)  | (0.07, 0.50) | 0.31 (0.13, 0.50) | 1.00 (0.86, 1.00) | 2        |
| IQoL32                                                        | (31, 3)  | (0.10, 0.60) | 0.27 (0.11, 0.44) | 1.00 (0.80, 1.00) | 1        |
| FBI                                                           | (25, 1)  | (0.04, 0.33) | 0.42 (0.20, 0.65) | 1.00 (0.92, 1.00) | 1        |
| ASQoL                                                         | (18, 4)  | (0.22, 0.67) | 0.22 (0.08, 0.38) | 0.88 (0.62, 1.00) | 0        |
| PKU-QoL                                                       | (65, 3)  | (0.05, 0.75) | 0.24 (0.09, 0.39) | 1.00 (0.75, 1.00) | 3        |
| CFQ-R                                                         | (50, 2)  | (0.04, 0.62) | 0.27 (0.11, 0.44) | 1.00 (0.86, 1.00) | 0        |
| EORTC QLQ-OV28                                                | (19, 1)  | (0.05, 0.33) | 0.41 (0.19, 0.64) | 1.00 (0.92, 1.00) | 4        |
| EORTC QLQ-PAN26                                               | (26, 2)  | (0.08, 0.50) | 0.31 (0.13, 0.50) | 1.00 (0.86, 1.00) | 0        |
| PANQOL                                                        | (26, 2)  | (0.08, 0.50) | 0.31 (0.13, 0.50) | 1.00 (0.86, 1.00) | 0        |
| ITP-PAQ                                                       | (44, 2)  | (0.05, 0.57) | 0.29 (0.12, 0.47) | 1.00 (0.88, 1.00) | 0        |
| AGDHA                                                         | (25, 0)  | (0.00, 0.29) | 0.46 (0.23, 0.70) | 1.00 (1.00, 1.00) | 2        |
| The Health assessment questionnaire disability index (HAQ-DI) | (126, 3) | (0.02, 0.87) | 0.21 (0.08, 0.36) | 1.00 (0.67, 1.00) | 0        |
| Toronto Extremity Salvage Score (TESS)                        | (32, 2)  | (0.06, 0.50) | 0.31 (0.13, 0.50) | 1.00 (0.87, 1.00) | 1        |
| UCLA-GIT                                                      | (34, 0)  | (0.00, 0.38) | 0.40 (0.19, 0.62) | 1.00 (1.00, 1.00) | 1        |
| Myasthenia Gravis Questionnaire (MGQ)                         | (15, 3)  | (0.20, 0.50) | 0.28 (0.11, 0.47) | 0.92 (0.75, 1.00) | 2        |
| ALSAQ-40                                                      | (40, 5)  | (0.12, 1.00) | 0.17 (0.07, 0.30) | 0.00 (0.00, 0.00) | 2        |

Table 2.2: The table presents the potential misclassification (median proportions of false positives and negatives along with 5th and 95th percentiles) for each QOL tool as compared to EQ-5D. The design (total number of items, overlap) and accuracy (sensitivity, specificity) are also provided. The table presents QOL tools for rare diseases. Prevalence of poor QOL is 50%.

| Tool name                                                     | Design   | Accuracy     | False negatives   | False positives   | Clusters |
|---------------------------------------------------------------|----------|--------------|-------------------|-------------------|----------|
| Lupus                                                         | (43, 4)  | (0.09, 0.80) | 0.54 (0.37, 0.69) | 0.67 (0.25, 1.00) | 2        |
| Kids <i>T IPT ools</i>                                        | (28, 2)  | (0.07, 0.50) | 0.65 (0.48, 0.82) | 0.89 (0.67, 1.00) | 2        |
| IQol32                                                        | (31, 3)  | (0.10, 0.60) | 0.60 (0.43, 0.76) | 0.83 (0.50, 1.00) | 1        |
| FBI                                                           | (25, 1)  | (0.04, 0.33) | 0.75 (0.57, 0.90) | 1.00 (0.80, 1.00) | 1        |
| ASQoL                                                         | (18, 4)  | (0.22, 0.67) | 0.54 (0.36, 0.71) | 0.60 (0.29, 0.88) | 0        |
| PKU-QoL                                                       | (65, 3)  | (0.05, 0.75) | 0.56 (0.39, 0.72) | 0.89 (0.50, 1.00) | 3        |
| CFQ-R                                                         | (50, 2)  | (0.04, 0.62) | 0.61 (0.43, 0.77) | 1.00 (0.67, 1.00) | 0        |
| EORTC QLQ-OV28                                                | (19, 1)  | (0.05, 0.33) | 0.75 (0.56, 0.90) | 0.93 (0.78, 1.00) | 4        |
| EORTC QLQ-PAN26                                               | (26, 2)  | (0.08, 0.50) | 0.65 (0.47, 0.82) | 0.88 (0.64, 1.00) | 0        |
| PANQOL                                                        | (26, 2)  | (0.08, 0.50) | 0.65 (0.47, 0.82) | 0.88 (0.64, 1.00) | 0        |
| ITP-PAQ                                                       | (44, 2)  | (0.05, 0.57) | 0.62 (0.45, 0.79) | 1.00 (0.67, 1.00) | 0        |
| AGDHA                                                         | (25, 0)  | (0.00, 0.29) | 0.78 (0.61, 0.94) | 1.00 (1.00, 1.00) | 2        |
| The Health assessment questionnaire disability index (HAQ-DI) | (126, 3) | (0.02, 0.87) | 0.53 (0.37, 0.68) | 1.00 (0.33, 1.00) | 0        |
| Toronto Extremity Salvage Score (TESS)                        | (32, 2)  | (0.06, 0.50) | 0.65 (0.48, 0.82) | 0.90 (0.67, 1.00) | 1        |
| UCLA-GIT                                                      | (34, 0)  | (0.00, 0.38) | 0.73 (0.56, 0.89) | 1.00 (1.00, 1.00) | 1        |
| Myasthenia Gravis Questionnaire (MGQ)                         | (15, 3)  | (0.20, 0.50) | 0.62 (0.43, 0.80) | 0.73 (0.45, 0.93) | 2        |
| ALSAQ-40                                                      | (40, 5)  | (0.12, 1.00) | 0.46 (0.31, 0.62) | 0.00 (0.00, 0.00) | 2        |

Table 2.3: The table presents the potential misclassification (median proportions of false positives and negatives along with 5th and 95th percentiles) for each QOL tool as compared to EQ-5D. The design (total number of items, overlap) and accuracy (sensitivity, specificity) are also provided. The table presents QOL tools for rare diseases. Prevalence of poor QOL is 80%.

| Tool name                                                     | Design   | Accuracy     | False negatives   | False positives   | Clusters |
|---------------------------------------------------------------|----------|--------------|-------------------|-------------------|----------|
| Lupus                                                         | (43, 4)  | (0.09, 0.80) | 0.82 (0.68, 0.93) | 0.33 (0.00, 1.00) | 2        |
| Kids <i>T IPT ools</i>                                        | (28, 2)  | (0.07, 0.50) | 0.88 (0.77, 0.96) | 0.67 (0.20, 1.00) | 2        |
| IQoL32                                                        | (31, 3)  | (0.10, 0.60) | 0.86 (0.73, 0.96) | 0.50 (0.00, 1.00) | 1        |
| FBI                                                           | (25, 1)  | (0.04, 0.33) | 0.92 (0.83, 1.00) | 0.83 (0.50, 1.00) | 1        |
| ASQoL                                                         | (18, 4)  | (0.22, 0.67) | 0.83 (0.68, 0.95) | 0.25 (0.00, 0.57) | 0        |
| PKU-QoL                                                       | (65, 3)  | (0.05, 0.75) | 0.85 (0.71, 0.93) | 0.50 (0.00, 1.00) | 3        |
| CFQ-R                                                         | (50, 2)  | (0.04, 0.62) | 0.86 (0.74, 0.96) | 0.71 (0.00, 1.00) | 0        |
| EORTC QLQ-OV28                                                | (19, 1)  | (0.05, 0.33) | 0.92 (0.82, 1.00) | 0.78 (0.40, 1.00) | 4        |
| EORTC QLQ-PAN26                                               | (26, 2)  | (0.08, 0.50) | 0.88 (0.77, 0.96) | 0.62 (0.20, 1.00) | 0        |
| PANQOL                                                        | (26, 2)  | (0.08, 0.50) | 0.88 (0.77, 0.96) | 0.62 (0.20, 1.00) | 0        |
| ITP-PAQ                                                       | (44, 2)  | (0.05, 0.57) | 0.88 (0.75, 0.96) | 0.71 (0.00, 1.00) | 0        |
| AGDHA                                                         | (25, 0)  | (0.00, 0.29) | 0.93 (0.85, 1.00) | 1.00 (1.00, 1.00) | 2        |
| The Health assessment questionnaire disability index (HAQ-DI) | (126, 3) | (0.02, 0.87) | 0.83 (0.69, 0.93) | 0.50 (0.00, 1.00) | 0        |
| Toronto Extremity Salvage Score (TESS)                        | (32, 2)  | (0.06, 0.50) | 0.88 (0.77, 0.97) | 0.67 (0.25, 1.00) | 1        |
| UCLA-GIT                                                      | (34, 0)  | (0.00, 0.38) | 0.92 (0.81, 1.00) | 1.00 (1.00, 1.00) | 1        |
| Myasthenia Gravis Questionnaire (MGQ)                         | (15, 3)  | (0.20, 0.50) | 0.87 (0.74, 0.96) | 0.38 (0.10, 0.71) | 2        |
| ALSAQ-40                                                      | (40, 5)  | (0.12, 1.00) | 0.79 (0.64, 0.90) | 0.00 (0.00, 0.00) | 2        |

Table 2.4: The table presents the potential misclassification (median proportions of false positives and negatives along with 5th and 95th percentiles) for each QOL tool as compared to EQ-5D. The design (total number of items, overlap) and accuracy (sensitivity, specificity) are also provided. The table presents disease-specific QOL tools with 10 highest and 10 lowest accuracy (sensitivity + specificity). Prevalence of poor QOL is 20%.

| Tool name                                                           | Design  | Accuracy     | False negatives   | False positives   | Clusters |
|---------------------------------------------------------------------|---------|--------------|-------------------|-------------------|----------|
| EASi-QoL                                                            | (20, 5) | (0.25, 1.00) | 0.15 (0.04, 0.28) | 0.00 (0.00, 0.00) | 1        |
| QUALIOST                                                            | (30, 5) | (0.17, 1.00) | 0.17 (0.07, 0.30) | 0.00 (0.00, 0.00) | 3        |
| PDQ-8                                                               | (8, 4)  | (0.50, 0.50) | 0.19 (0.05, 0.38) | 0.81 (0.62, 0.95) | 3        |
| Chronic Respiratory Questionnaire (CRQ)                             | (46, 4) | (0.09, 0.83) | 0.21 (0.08, 0.36) | 1.00 (0.50, 1.00) | 0        |
| CRQ-SAS 17                                                          | (17, 4) | (0.24, 0.67) | 0.22 (0.08, 0.38) | 0.86 (0.62, 1.00) | 1        |
| OAKHQoL                                                             | (43, 4) | (0.09, 0.80) | 0.22 (0.08, 0.36) | 1.00 (0.60, 1.00) | 0        |
| PsaQoL                                                              | (28, 4) | (0.14, 0.75) | 0.22 (0.08, 0.37) | 0.89 (0.60, 1.00) | 2        |
| EORTC <sub>QLQ</sub> C 30                                           | (30, 4) | (0.13, 0.75) | 0.22 (0.08, 0.37) | 0.89 (0.62, 1.00) | 2        |
| EORTC-QLQ-C30                                                       | (22, 4) | (0.18, 0.67) | 0.23 (0.09, 0.39) | 0.89 (0.67, 1.00) | 1        |
| Stroke-Specific Quality of Life Scale (SS-QOL)                      | (78, 3) | (0.04, 0.80) | 0.23 (0.09, 0.38) | 1.00 (0.75, 1.00) | 2        |
| MSQ                                                                 | (14, 1) | (0.07, 0.20) | 0.55 (0.25, 0.80) | 1.00 (0.90, 1.00) | 1        |
| ADDQol                                                              | (8, 0)  | (0.00, 0.17) | 0.60 (0.33, 0.86) | 1.00 (1.00, 1.00) | 4        |
| ICIQ-UI                                                             | (10, 0) | (0.00, 0.17) | 0.60 (0.33, 0.86) | 1.00 (1.00, 1.00) | 4        |
| International Continence Society short-form male survey [ICSmaleSF] | (14, 0) | (0.00, 0.17) | 0.60 (0.33, 0.86) | 1.00 (1.00, 1.00) | 0        |
| MADRS-S                                                             | (8, 0)  | (0.00, 0.17) | 0.60 (0.33, 0.86) | 1.00 (1.00, 1.00) | 0        |
| ICSmaleSF                                                           | (10, 0) | (0.00, 0.17) | 0.60 (0.33, 0.86) | 1.00 (1.00, 1.00) | 0        |
| Chronic Sinusitis Survey (CSS)                                      | (6, 0)  | (0.00, 0.17) | 0.60 (0.33, 0.86) | 1.00 (1.00, 1.00) | 1        |
| WHO-DTSQ                                                            | (8, 0)  | (0.00, 0.17) | 0.60 (0.33, 0.86) | 1.00 (1.00, 1.00) | 0        |
| BPH Index (Bothersome Index)                                        | (8, 0)  | (0.00, 0.17) | 0.60 (0.33, 0.86) | 1.00 (1.00, 1.00) | 1        |
| KDQOL Cognitive Function (KDQOL-CF)                                 | (3, 0)  | (0.00, 0.00) | 1.00 (1.00, 1.00) | 1.00 (1.00, 1.00) | 0        |

Table 2.5: The table presents the potential misclassification (median proportions of false positives and negatives along with 5th and 95th percentiles) for each QOL tool as compared to EQ-5D. The design (total number of items, overlap) and accuracy (sensitivity, specificity) are also provided. The table presents disease-specific QOL tools with 10 highest and 10 lowest accuracy (sensitivity + specificity). Prevalence of poor QOL is 20%.

| Tool name                                                           | Design  | Accuracy     | False negatives   | False positives   | Clusters |
|---------------------------------------------------------------------|---------|--------------|-------------------|-------------------|----------|
| EASi-QoL                                                            | (20, 5) | (0.25, 1.00) | 0.43 (0.27, 0.59) | 0.00 (0.00, 0.00) | 1        |
| QUALIOST                                                            | (30, 5) | (0.17, 1.00) | 0.45 (0.30, 0.62) | 0.00 (0.00, 0.00) | 3        |
| PDQ-8                                                               | (8, 4)  | (0.50, 0.50) | 0.50 (0.29, 0.72) | 0.50 (0.29, 0.72) | 3        |
| Chronic Respiratory Questionnaire (CRQ)                             | (46, 4) | (0.09, 0.83) | 0.52 (0.36, 0.68) | 0.67 (0.00, 1.00) | 0        |
| CRQ-SAS 17                                                          | (17, 4) | (0.24, 0.67) | 0.54 (0.35, 0.71) | 0.60 (0.29, 0.88) | 1        |
| OAKHQoL                                                             | (43, 4) | (0.09, 0.80) | 0.54 (0.37, 0.69) | 0.67 (0.25, 1.00) | 0        |
| PsaQoL                                                              | (28, 4) | (0.14, 0.75) | 0.54 (0.36, 0.70) | 0.67 (0.25, 1.00) | 2        |
| EORTC <sub>QLQ</sub> C 30                                           | (30, 4) | (0.13, 0.75) | 0.54 (0.36, 0.70) | 0.67 (0.25, 1.00) | 2        |
| EORTC-QLQ-C30                                                       | (22, 4) | (0.18, 0.67) | 0.55 (0.38, 0.72) | 0.67 (0.33, 1.00) | 1        |
| Stroke-Specific Quality of Life Scale (SS-QOL)                      | (78, 3) | (0.04, 0.80) | 0.54 (0.38, 0.70) | 1.00 (0.50, 1.00) | 2        |
| MSQ                                                                 | (14, 1) | (0.07, 0.20) | 0.83 (0.65, 0.95) | 0.93 (0.77, 1.00) | 1        |
| ADDQol                                                              | (8, 0)  | (0.00, 0.17) | 0.87 (0.71, 1.00) | 1.00 (1.00, 1.00) | 4        |
| ICIQ-UI                                                             | (10, 0) | (0.00, 0.17) | 0.87 (0.71, 1.00) | 1.00 (1.00, 1.00) | 4        |
| International Continence Society short-form male survey [ICSmaleSF] | (14, 0) | (0.00, 0.17) | 0.87 (0.71, 1.00) | 1.00 (1.00, 1.00) | 0        |
| MADRS-S                                                             | (8, 0)  | (0.00, 0.17) | 0.87 (0.71, 1.00) | 1.00 (1.00, 1.00) | 0        |
| ICSmaleSF                                                           | (10, 0) | (0.00, 0.17) | 0.87 (0.71, 1.00) | 1.00 (1.00, 1.00) | 0        |
| Chronic Sinusitis Survey (CSS)                                      | (6, 0)  | (0.00, 0.17) | 0.87 (0.71, 1.00) | 1.00 (1.00, 1.00) | 1        |
| WHO-DTSQ                                                            | (8, 0)  | (0.00, 0.17) | 0.87 (0.71, 1.00) | 1.00 (1.00, 1.00) | 0        |
| BPH Index (Bothersome Index)                                        | (8, 0)  | (0.00, 0.17) | 0.87 (0.71, 1.00) | 1.00 (1.00, 1.00) | 1        |
| KDQOL Cognitive Function (KDQOL-CF)                                 | (3, 0)  | (0.00, 0.00) | 1.00 (1.00, 1.00) | 1.00 (1.00, 1.00) | 0        |

Table 2.6: The table presents the potential misclassification (median proportions of false positives and negatives along with 5th and 95th percentiles) for each QOL tool as compared to EQ-5D. The design (total number of items, overlap) and accuracy (sensitivity, specificity) are also provided. The table presents disease-specific QOL tools with 10 highest and 10 lowest accuracy (sensitivity + specificity). Prevalence of poor QOL is 20%.

| Tool name                                                           | Design  | Accuracy     | False negatives   | False positives   | Clusters |
|---------------------------------------------------------------------|---------|--------------|-------------------|-------------------|----------|
| EASi-QoL                                                            | (20, 5) | (0.25, 1.00) | 0.75 (0.60, 0.89) | 0.00 (0.00, 0.00) | 1        |
| QUALIOST                                                            | (30, 5) | (0.17, 1.00) | 0.78 (0.63, 0.90) | 0.00 (0.00, 0.00) | 3        |
| PDQ-8                                                               | (8, 4)  | (0.50, 0.50) | 0.81 (0.62, 0.95) | 0.19 (0.05, 0.38) | 3        |
| Chronic Respiratory Questionnaire (CRQ)                             | (46, 4) | (0.09, 0.83) | 0.82 (0.68, 0.93) | 0.33 (0.00, 1.00) | 0        |
| CRQ-SAS 17                                                          | (17, 4) | (0.24, 0.67) | 0.83 (0.68, 0.95) | 0.25 (0.00, 0.56) | 1        |
| OAKHQoL                                                             | (43, 4) | (0.09, 0.80) | 0.82 (0.68, 0.93) | 0.33 (0.00, 1.00) | 0        |
| PsaQoL                                                              | (28, 4) | (0.14, 0.75) | 0.83 (0.68, 0.93) | 0.29 (0.00, 0.67) | 2        |
| EORTC <sub>QLQ</sub> C 30                                           | (30, 4) | (0.13, 0.75) | 0.83 (0.68, 0.93) | 0.30 (0.00, 0.75) | 2        |
| EORTC-QLQ-C30                                                       | (22, 4) | (0.18, 0.67) | 0.83 (0.69, 0.96) | 0.29 (0.00, 0.67) | 1        |
| Stroke-Specific Quality of Life Scale (SS-QOL)                      | (78, 3) | (0.04, 0.80) | 0.83 (0.70, 0.93) | 0.50 (0.00, 1.00) | 2        |
| MSQ                                                                 | (14, 1) | (0.07, 0.20) | 0.96 (0.87, 1.00) | 0.75 (0.40, 1.00) | 1        |
| ADDQol                                                              | (8, 0)  | (0.00, 0.17) | 0.96 (0.88, 1.00) | 1.00 (1.00, 1.00) | 4        |
| ICIQ-UI                                                             | (10, 0) | (0.00, 0.17) | 0.96 (0.88, 1.00) | 1.00 (1.00, 1.00) | 4        |
| International Continence Society short-form male survey [ICSmaleSF] | (14, 0) | (0.00, 0.17) | 0.96 (0.88, 1.00) | 1.00 (1.00, 1.00) | 0        |
| MADRS-S                                                             | (8, 0)  | (0.00, 0.17) | 0.96 (0.88, 1.00) | 1.00 (1.00, 1.00) | 0        |
| ICSmaleSF                                                           | (10, 0) | (0.00, 0.17) | 0.96 (0.88, 1.00) | 1.00 (1.00, 1.00) | 0        |
| Chronic Sinusitis Survey (CSS)                                      | (6, 0)  | (0.00, 0.17) | 0.96 (0.88, 1.00) | 1.00 (1.00, 1.00) | 1        |
| WHO-DTSQ                                                            | (8, 0)  | (0.00, 0.17) | 0.96 (0.88, 1.00) | 1.00 (1.00, 1.00) | 0        |
| BPH Index (Bothersome Index)                                        | (8, 0)  | (0.00, 0.17) | 0.96 (0.88, 1.00) | 1.00 (1.00, 1.00) | 1        |
| KDQOL Cognitive Function (KDQOL-CF)                                 | (3, 0)  | (0.00, 0.00) | 1.00 (1.00, 1.00) | 1.00 (1.00, 1.00) | 0        |

Table 2.7: The table presents the potential misclassification (median proportions of false positives and negatives along with 5th and 95th percentiles) for each QOL tool as compared to EQ-5D. The design (total number of items, overlap), accuracy (sensitivity, specificity) are also provided. The table presents symptom-specific QOL tools with 10 highest and 10 lowest accuracy (sensitivity + specificity). Prevalence of poor QOL is 20%.

| Tool name                                                                                | Design  | Accuracy     | False negatives   | False positives   | Cluster |
|------------------------------------------------------------------------------------------|---------|--------------|-------------------|-------------------|---------|
| PedsQL                                                                                   | (22, 5) | (0.23, 1.00) | 0.17 (0.07, 0.28) | 0.00 (0.00, 0.00) | 3       |
| Nottingham Health Profile (NHP)                                                          | (45, 5) | (0.11, 1.00) | 0.17 (0.07, 0.30) | 0.00 (0.00, 0.00) | 1       |
| North American Spine Society (NASS) Lumbar Spine Instrument                              | (65, 5) | (0.08, 1.00) | 0.18 (0.07, 0.31) | 0.00 (0.00, 0.00) | 1       |
| SGRQ                                                                                     | (55, 4) | (0.07, 0.86) | 0.21 (0.08, 0.35) | 1.00 (0.50, 1.00) | 2       |
| CAMPHOR                                                                                  | (65, 4) | (0.06, 0.86) | 0.21 (0.08, 0.35) | 1.00 (0.50, 1.00) | 0       |
| PROMIS                                                                                   | (29, 4) | (0.14, 0.75) | 0.22 (0.08, 0.37) | 0.89 (0.62, 1.00) | 1       |
| Severe Respiratory Insufficiency (SRI)                                                   | (49, 3) | (0.06, 0.71) | 0.24 (0.10, 0.40) | 1.00 (0.77, 1.00) | 0       |
| Child Health Questionnaire Parent Form 50 Questions (CHQ-PF50)                           | (51, 3) | (0.06, 0.71) | 0.24 (0.10, 0.40) | 1.00 (0.78, 1.00) | 0       |
| Thyroid-Specific Quality of Life Questionnaire (ThyroPro)                                | (84, 2) | (0.02, 0.73) | 0.25 (0.10, 0.40) | 1.00 (0.83, 1.00) | 1       |
| CHQ <sub>P</sub> F 28                                                                    | (28, 3) | (0.11, 0.60) | 0.26 (0.11, 0.44) | 1.00 (0.78, 1.00) | 1       |
| Hospital Anxiety and Depression Scale (HADS)                                             | (14, 1) | (0.07, 0.20) | 0.55 (0.25, 0.80) | 1.00 (0.90, 1.00) | 0       |
| International Consultation on Incontinence Questionnaire- Urinary Incontinence [ICIQ-UI] | (4, 1)  | (0.25, 0.00) | 1.00 (1.00, 1.00) | 0.96 (0.85, 1.00) | 2       |
| Xerostomia Inventory (XI)                                                                | (14, 0) | (0.00, 0.17) | 0.60 (0.33, 0.86) | 1.00 (1.00, 1.00) | 1       |
| Ocular Surface Disease Index (OSDI)                                                      | (12, 0) | (0.00, 0.17) | 0.60 (0.33, 0.86) | 1.00 (1.00, 1.00) | 1       |
| General Oral Health Assessment Index (GOHAI)                                             | (12, 0) | (0.00, 0.17) | 0.60 (0.33, 0.86) | 1.00 (1.00, 1.00) | 0       |
| Rosenberg Self Esteem Questionnaire (RSEQ)                                               | (10, 0) | (0.00, 0.17) | 0.60 (0.33, 0.86) | 1.00 (1.00, 1.00) | 1       |
| American Urological Association (AUA) symptom score                                      | (11, 0) | (0.00, 0.17) | 0.60 (0.33, 0.86) | 1.00 (1.00, 1.00) | 0       |
| WHO <sub>5</sub>                                                                         | (5, 0)  | (0.00, 0.00) | 1.00 (1.00, 1.00) | 1.00 (1.00, 1.00) | 0       |
| BCSS                                                                                     | (3, 0)  | (0.00, 0.00) | 1.00 (1.00, 1.00) | 1.00 (1.00, 1.00) | 3       |
| FABQ-PA                                                                                  | (5, 0)  | (0.00, 0.00) | 1.00 (1.00, 1.00) | 1.00 (1.00, 1.00) | 0       |



Table 2.8: The table presents the potential misclassification (median proportions of false positives and negatives along with 5th and 95th percentiles) for each QOL tool as compared to EQ-5D. The design (total number of items, overlap), accuracy (sensitivity, specificity) are also provided. The table presents symptom-specific QOL tools with 10 highest and 10 lowest accuracy (sensitivity + specificity). Prevalence of poor QOL is 20%.

| Tool name                                                                                | Design  | Accuracy     | False negatives   | False positives   | Cluster |
|------------------------------------------------------------------------------------------|---------|--------------|-------------------|-------------------|---------|
| PedsQL                                                                                   | (22, 5) | (0.23, 1.00) | 0.43 (0.28, 0.60) | 0.00 (0.00, 0.00) | 3       |
| Nottingham Health Profile (NHP)                                                          | (45, 5) | (0.11, 1.00) | 0.47 (0.31, 0.63) | 0.00 (0.00, 0.00) | 1       |
| North American Spine Society (NASS) Lumbar Spine Instrument                              | (65, 5) | (0.08, 1.00) | 0.48 (0.32, 0.63) | 0.00 (0.00, 0.00) | 1       |
| SGRQ                                                                                     | (55, 4) | (0.07, 0.86) | 0.52 (0.36, 0.68) | 0.67 (0.00, 1.00) | 2       |
| CAMPHOR                                                                                  | (65, 4) | (0.06, 0.86) | 0.52 (0.36, 0.68) | 0.75 (0.00, 1.00) | 0       |
| PROMIS                                                                                   | (29, 4) | (0.14, 0.75) | 0.54 (0.36, 0.70) | 0.67 (0.25, 1.00) | 1       |
| Severe Respiratory Insufficiency (SRI)                                                   | (49, 3) | (0.06, 0.71) | 0.57 (0.40, 0.73) | 0.83 (0.50, 1.00) | 0       |
| Child Health Questionnaire Parent Form 50 Questions (CHQ-PF50)                           | (51, 3) | (0.06, 0.71) | 0.57 (0.40, 0.73) | 0.86 (0.50, 1.00) | 0       |
| Thyroid-Specific Quality of Life Questionnaire (ThyroPro)                                | (84, 2) | (0.02, 0.73) | 0.58 (0.41, 0.73) | 1.00 (0.67, 1.00) | 1       |
| CHQ <sub>P</sub> F 28                                                                    | (28, 3) | (0.11, 0.60) | 0.60 (0.42, 0.76) | 0.80 (0.50, 1.00) | 1       |
| Hospital Anxiety and Depression Scale (HADS)                                             | (14, 1) | (0.07, 0.20) | 0.83 (0.65, 0.95) | 0.93 (0.77, 1.00) | 0       |
| International Consultation on Incontinence Questionnaire- Urinary Incontinence [ICIQ-UI] | (4, 1)  | (0.25, 0.00) | 1.00 (1.00, 1.00) | 0.81 (0.64, 0.94) | 2       |
| Xerostomia Inventory (XI)                                                                | (14, 0) | (0.00, 0.17) | 0.87 (0.71, 1.00) | 1.00 (1.00, 1.00) | 1       |
| Ocular Surface Disease Index (OSDI)                                                      | (12, 0) | (0.00, 0.17) | 0.87 (0.71, 1.00) | 1.00 (1.00, 1.00) | 1       |
| General Oral Health Assessment Index (GOHAI)                                             | (12, 0) | (0.00, 0.17) | 0.87 (0.71, 1.00) | 1.00 (1.00, 1.00) | 0       |
| Rosenberg Self Esteem Questionnaire (RSEQ)                                               | (10, 0) | (0.00, 0.17) | 0.87 (0.71, 1.00) | 1.00 (1.00, 1.00) | 1       |
| American Urological Association (AUA) symptom score                                      | (11, 0) | (0.00, 0.17) | 0.87 (0.71, 1.00) | 1.00 (1.00, 1.00) | 0       |
| WHO <sub>5</sub>                                                                         | (5, 0)  | (0.00, 0.00) | 1.00 (1.00, 1.00) | 1.00 (1.00, 1.00) | 0       |
| BCSS                                                                                     | (3, 0)  | (0.00, 0.00) | 1.00 (1.00, 1.00) | 1.00 (1.00, 1.00) | 3       |
| FABQ-PA                                                                                  | (5, 0)  | (0.00, 0.00) | 1.00 (1.00, 1.00) | 1.00 (1.00, 1.00) | 0       |

Table 2.9: The table presents the potential misclassification (median proportions of false positives and negatives along with 5th and 95th percentiles) for each QOL tool as compared to EQ-5D. The design (total number of items, overlap), accuracy (sensitivity, specificity) are also provided. The table presents symptom-specific QOL tools with 10 highest and 10 lowest accuracy (sensitivity + specificity). Prevalence of poor QOL is 20%.

| Tool name                                                                                | Design  | Accuracy     | False negatives   | False positives   | Cluster |
|------------------------------------------------------------------------------------------|---------|--------------|-------------------|-------------------|---------|
| PedsQL                                                                                   | (22, 5) | (0.23, 1.00) | 0.76 (0.61, 0.89) | 0.00 (0.00, 0.00) | 3       |
| Nottingham Health Profile (NHP)                                                          | (45, 5) | (0.11, 1.00) | 0.79 (0.64, 0.90) | 0.00 (0.00, 0.00) | 1       |
| North American Spine Society (NASS) Lumbar Spine Instrument                              | (65, 5) | (0.08, 1.00) | 0.79 (0.66, 0.90) | 0.00 (0.00, 0.00) | 1       |
| SGRQ                                                                                     | (55, 4) | (0.07, 0.86) | 0.81 (0.68, 0.93) | 0.33 (0.00, 1.00) | 2       |
| CAMPHOR                                                                                  | (65, 4) | (0.06, 0.86) | 0.82 (0.68, 0.93) | 0.33 (0.00, 1.00) | 0       |
| PROMIS                                                                                   | (29, 4) | (0.14, 0.75) | 0.83 (0.68, 0.93) | 0.29 (0.00, 0.71) | 1       |
| Severe Respiratory Insufficiency (SRI)                                                   | (49, 3) | (0.06, 0.71) | 0.85 (0.71, 0.96) | 0.50 (0.00, 1.00) | 0       |
| Child Health Questionnaire Parent Form 50 Questions (CHQ-PF50)                           | (51, 3) | (0.06, 0.71) | 0.85 (0.71, 0.96) | 0.50 (0.00, 1.00) | 0       |
| Thyroid-Specific Quality of Life Questionnaire (ThyroPro)                                | (84, 2) | (0.02, 0.73) | 0.85 (0.72, 0.96) | 1.00 (0.00, 1.00) | 1       |
| CHQ <sub>P</sub> F 28                                                                    | (28, 3) | (0.11, 0.60) | 0.86 (0.73, 0.96) | 0.50 (0.00, 1.00) | 1       |
| Hospital Anxiety and Depression Scale (HADS)                                             | (14, 1) | (0.07, 0.20) | 0.96 (0.87, 1.00) | 0.75 (0.40, 1.00) | 0       |
| International Consultation on Incontinence Questionnaire- Urinary Incontinence [ICIQ-UI] | (4, 1)  | (0.25, 0.00) | 1.00 (1.00, 1.00) | 0.50 (0.25, 0.75) | 2       |
| Xerostomia Inventory (XI)                                                                | (14, 0) | (0.00, 0.17) | 0.96 (0.88, 1.00) | 1.00 (1.00, 1.00) | 1       |
| Ocular Surface Disease Index (OSDI)                                                      | (12, 0) | (0.00, 0.17) | 0.96 (0.88, 1.00) | 1.00 (1.00, 1.00) | 1       |
| General Oral Health Assessment Index (GOHAI)                                             | (12, 0) | (0.00, 0.17) | 0.96 (0.88, 1.00) | 1.00 (1.00, 1.00) | 0       |
| Rosenberg Self Esteem Questionnaire (RSEQ)                                               | (10, 0) | (0.00, 0.17) | 0.96 (0.88, 1.00) | 1.00 (1.00, 1.00) | 1       |
| American Urological Association (AUA) symptom score                                      | (11, 0) | (0.00, 0.17) | 0.96 (0.88, 1.00) | 1.00 (1.00, 1.00) | 0       |
| WHO <sub>5</sub>                                                                         | (5, 0)  | (0.00, 0.00) | 1.00 (1.00, 1.00) | 1.00 (1.00, 1.00) | 0       |
| BCSS                                                                                     | (3, 0)  | (0.00, 0.00) | 1.00 (1.00, 1.00) | 1.00 (1.00, 1.00) | 3       |
| FABQ-PA                                                                                  | (5, 0)  | (0.00, 0.00) | 1.00 (1.00, 1.00) | 1.00 (1.00, 1.00) | 0       |

Table 3.1: QOL Tools and reviewed scientific papers

|                           | Rare-disease | Disease-specific | Subject-specific |
|---------------------------|--------------|------------------|------------------|
| Number of tools           | 10           | 73               | 58               |
| Number of papers          | 15           | 112              | 71               |
| Number of clinical trials | 8            | 74               | 43               |

Table 3.2: Comparison against general QOL Tools and reviewed scientific papers

|                    | <b>Rare-disease</b> |         | <b>Disease-specific</b> |            | <b>Subject-specific</b> |            |
|--------------------|---------------------|---------|-------------------------|------------|-------------------------|------------|
|                    | SF-36               | EQ5D    | SF-36                   | EQ5D       | SF-36                   | EQ5D       |
| Concordance 1      | 2 (18.18)           | 0 (NaN) | 25 (29.76)              | 23 (35.38) | 24 (36.36)              | 5 (16.13)  |
| Concordance 2      | 6 (54.55)           | 0 (NaN) | 35 (41.67)              | 25 (38.46) | 30 (45.45)              | 17 (54.84) |
| Concordance 3      | 3 (27.27)           | 0 (NaN) | 24 (28.57)              | 17 (26.15) | 12 (18.18)              | 9 (29.03)  |
| Timepoints >1      | 2                   | 0       | 38                      | 27         | 42                      | 7          |
| QOL change         | 2                   | 0       | 34                      | 23         | 36                      | 7          |
| Concordance change | 0                   | 0       | 0                       | 2          | 7                       | 0          |
